# The Anesthesiologist's Bookshelf

Edited by HUBERTA M. LIVINGSTONE, M.D.

**Manual of Anesthesiology. For Residents and Medical Students.** SECOND EDITION. BY HERMAN SCHWARZ, M.D., S. H. NGAI, M.D., AND E. M. PAPPER, M.D. Anesthesiology Service, the Presbyterian Hospital, Department of Anesthesiology, Columbia University College of Physicians and Surgeons, New York City. Publication No. 476, American Lecture Series. Cloth, \$6.00. Pp. 189, with 24 figures. Charles C Thomas, Springfield, Ill., 1962.

The selection of a textbook for medical students and beginning anesthesiologists in the past consisted largely of assigning sections for reading in basic science texts. Various teachers mimeographed material for their students. This book developed by such a process, and the second edition represents further refinement. The authors have wide experience in teaching both medical students and residents in training, and they have acquired considerable experience in the process of writing this book. The choice of subject matter for presentation to the beginning student varies with different teachers, and that selected by these authors is a compromise between technical how-to-do-it instructions and basic principles of anesthesiology. With this manual the medical student can be introduced into the field of anesthesiology, and the resident can use it for the first few weeks of general introduction into this specialty.

The book is beautifully printed and bound. Each section is concisely written with little padding, with duplication of organization from chapter to chapter for easy reference. An excellent index is present, with a minimum of important references listed at the end of each chapter.

D. W. EASTWOOD, M.D.

**The Lung: Clinical Physiology and Pulmonary Function Tests.** SECTION EDITION. BY JULIUS H. CONROU, JR., M.D., Director of Cardiovascular Research Institute and Professor of Physiology, University of Cali-

fornia Medical Center, San Francisco; ROBERT E. FORSTER II, M.D., Professor of Physiology, Graduate School of Medicine, University of Pennsylvania, Philadelphia; ARTHUR B. DUBOIS, M.D., Professor of Physiology, Graduate School of Medicine, University of Pennsylvania, Philadelphia; WILLIAM A. BRISCOL, M.D., Assistant Professor of Medicine, Columbia University College of Physicians and Surgeons, AND ELIZABETH CARLSEN, Ph.D., Assistant Professor of Physiology, Columbia University College of Physicians and Surgeons, New York City. Cloth, \$8.00. Pp. 390, with 63 illustrations. Year Book Medical Publishers, Inc., Chicago, Illinois, 1962.

This monograph is constructed largely around illustrations. They are schematic, and artistic license has been used freely to explain in simple words pulmonary physiology of interest and importance in clinical medicine. References appear only in the Appendix. The text is divided into three parts. Part I presents principles of pulmonary physiology. Lung volumes, ventilation, pulmonary circulation, diffusion of gases, blood gas transport and the mechanics of breathing are covered in detail, giving the reader an appreciation of normal values and other pulmonary changes that may accompany common causes of pulmonary dysfunction.

Part II covers the practical approach to evaluation of pulmonary function, patterns of pulmonary function in cardiopulmonary and respiratory disorders, pulmonary disability, respiratory problems before, during and after anesthesia, and physiologic therapy. These clinical applications should be extremely stimulating to the clinician since it represents problems and methods of approach in daily practice.

Part III is an extended appendix containing much detailed information and formulas for the understanding of various tests.

The most important change in this edition has been the addition of five chapters espe-
